# Supplementary material
Source: publisher figshare collection journal article supplement (https://aacr.figshare.com/articles/dataset/_/22430341)
Supplement: Supplementary file 1 [file 39876673]

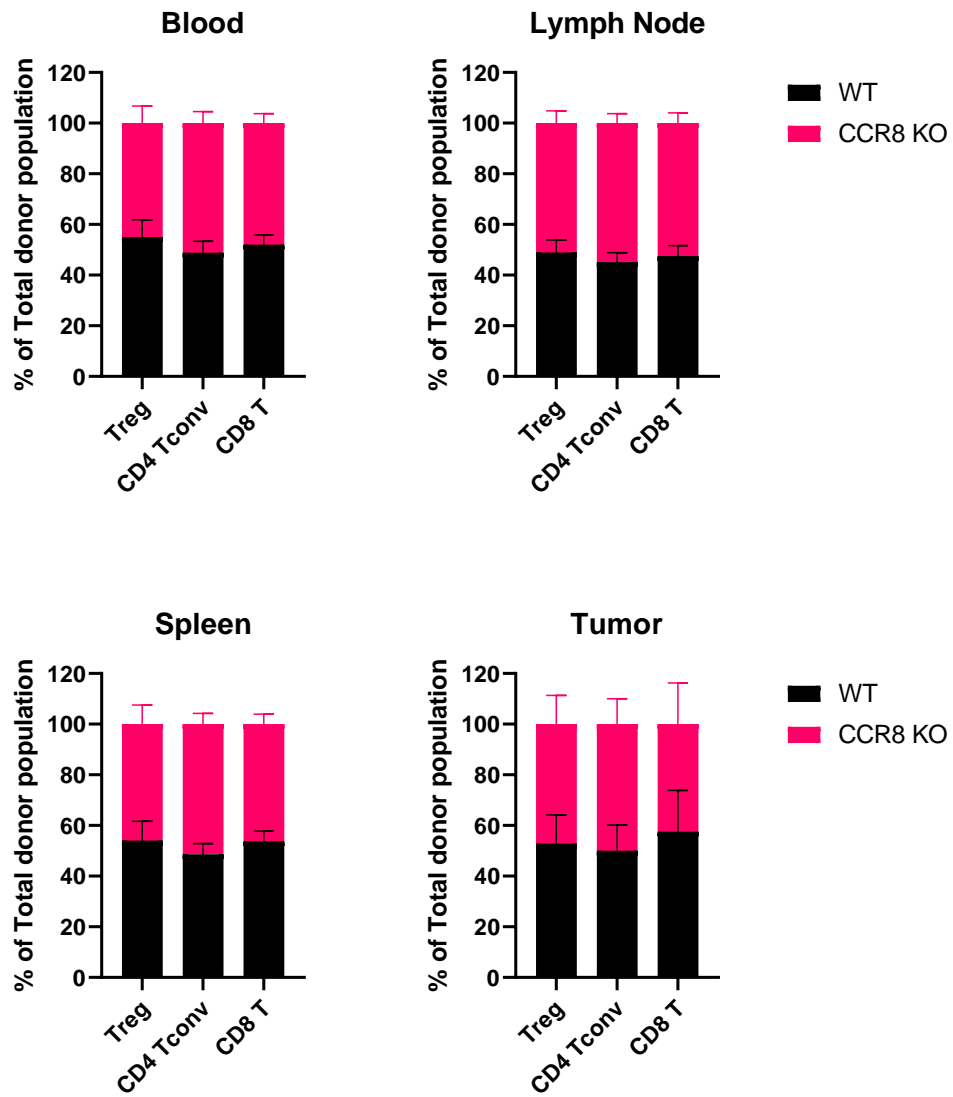

Supplemental Figure 4: Donor immune cell reconstitution in the blood post *Ccr8*<sup>-/-</sup> donor bone marrow transplant
